# Supplementary material
Source: PubMed Central journal article supplement (PMC6484387)
Supplement: blood886275-suppl1.pdf [file blood886275-suppl1.pdf]

## Supplemental Data for

### **Phylogenetic and functional analysis of ADAMTS13 identifies highly conserved domains essential for allosteric regulation**

Joshua Muia,<sup>1</sup> Jian Zhu,<sup>1</sup> Suellen C. Greco,<sup>2</sup> Karen Vanhoorelbeke,<sup>3</sup> Garima Gupta,<sup>1</sup> Lisa A. Westfield,<sup>1</sup> and J. Evan Sadler<sup>1,4</sup>

From the <sup>1</sup>Departments of Medicine, <sup>4</sup>Biochemistry and Molecular Biophysics, and <sup>2</sup>Division of Comparative Medicine, Washington University School of Medicine; and <sup>3</sup>Laboratory for Thrombosis Research, IRF Life Sciences, KU Leuven Campus Kulak Kortrijk, Kortrijk, Belgium

Supplemental Table 1. ADAMTS13 domain structure for selected vertebrate species

Supplemental Table 2. Inhibition of vertebrate plasma ADAMTS13 by monoclonal antibody 3H9

Supplemental Figure 1. Phylogram of vertebrate ADAMTS13

Supplemental Figure 2. Vertebrate ADAMTS13 gene structure

Supplemental Table 1. ADAMTS13 domain structure for selected vertebrate species

Page 1 of 11

| No. | Tax ID | Organism name                       | Common name             | Domains absent <sup>a</sup> | Furin site sequence <sup>b</sup> | GenBank accession number |
|-----|--------|-------------------------------------|-------------------------|-----------------------------|----------------------------------|--------------------------|
| 1   | 57068  | <i>Acanthisitta chloris</i>         | Rifleman                | T3, T6a, T6                 | RLQKR                            | BK009996                 |
| 2   | 32536  | <i>Acinonyx jubatus</i>             | cheetah                 | T3                          | RLRR                             | BK009997                 |
| 3   | 10068  | <i>Acomys cahirinus</i>             | Egyptian spiny mouse    | Long propeptide             | RWRR                             | BK009998                 |
| 4   | 8715   | <i>Agkistrodon piscivorus</i>       | cottonmouth             | T3, T6a                     | RIRR                             | BK009999                 |
| 5   | 9646   | <i>Ailuropoda melanoleuca</i>       | Giant panda             | T6                          | RVRR                             | BK010000                 |
| 6   | 9079   | <i>Alectoris rufa</i>               | red-legged partridge    | T3, T6a                     | RLQKR                            | BK010001                 |
| 7   | 8496   | <i>Alligator mississippiensis</i>   | American alligator      | None                        | RHWKR                            | BK010002                 |
| 8   | 38654  | <i>Alligator sinensis</i>           | Chinese alligator       | None                        | RHWKR                            | BK010003                 |
| 9   | 12930  | <i>Amazona aestiva</i>              | blue-fronted amazon     | T3, T6a, T6                 | RLQKR                            | BK010004                 |
| 10  | 241585 | <i>Amazona vittata</i>              | Puerto Rican parrot     | T3, T6a, T6                 | RLQKR                            | BK010005                 |
| 11  | 61819  | <i>Amphilophus citrinellus</i>      | Midas cichlid           | Long propeptide, T6a        | RLRR                             | BK010006                 |
| 12  | 8839   | <i>Anas platyrhynchos</i>           | Mallard                 | T3, T6a                     | RLQKR                            | XM_005013264.2           |
| 13  | 7936   | <i>Anguilla anguilla</i>            | European eel            | T6a                         | GPRRVLR                          | BK010007                 |
| 14  | 7937   | <i>Anguilla japonica</i>            | Japanese eel            | T6a                         | GPRRVLR                          | BK010008                 |
| 15  | 229290 | <i>Anoplopoma fimbria</i>           | sablefish               | Long propeptide, T6a        | RRLRR                            | BK010009                 |
| 16  | 8845   | <i>Anser cygnoides domesticus</i>   | Swan goose              | T3, T6a                     | RLQKR                            | BK010010                 |
| 17  | 37293  | <i>Aotus nancymaae</i>              | Ma's night monkey       | Long propeptide, T6a        | RQRR                             | BK010011                 |
| 18  | 57397  | <i>Apaloderma vittatum</i>          | Bar-tailed trogon       | T3, T6a, T6                 | RLQKR                            | BK010012                 |
| 19  | 55534  | <i>Apalone spinifera</i>            | Spiny softshell turtle  | None                        | RLWKR                            | BK010013                 |
| 20  | 10129  | <i>Apodemus sylvaticus</i>          | European woodmouse      | Long propeptide, T6         | RLRRRR                           | BK010014                 |
| 21  | 9233   | <i>Aptenodytes forsteri</i>         | Emperor penguin         | T3, T6a, T6                 | RLQKR                            | XM_009286970.1           |
| 22  | 8822   | <i>Apteryx australis mantelli</i>   | brown kiwi              | T3, T6a                     | RLQKR                            | XM_013941757.1           |
| 23  | 216574 | <i>Aquila chrysaetos canadensis</i> | Canadian golden eagle   | T3, T6a, T6                 | RLQKR                            | BK010015                 |
| 24  | 7994   | <i>Astyanax mexicanus</i>           | Mexican tetra           | T6a                         | HHRIQR                           | BK010016                 |
| 25  | 9368   | <i>Atelerix albiventris</i>         | middle-African hedgehog | Long propeptide, T3, T6a    | TPSSGLQSPA                       | BK010017                 |

Supplemental Table 1. ADAMTS13 domain structure for selected vertebrate species

Page 2 of 11

| No. | Tax ID | Organism name                              | Common name                     | Domains absent <sup>a</sup> | Furin site sequence <sup>b</sup> | GenBank accession number |
|-----|--------|--------------------------------------------|---------------------------------|-----------------------------|----------------------------------|--------------------------|
| 26  | 52670  | <i>Austrofundulus limnaeus</i>             | Venezuelan mosquito fish        | Long propeptide, T6a        | RLRR                             | XM_014007162.1           |
| 27  | 310752 | <i>Balaenoptera acutorostrata scammoni</i> | Minke whale                     | Long propeptide             | RLRRR                            | BK010018                 |
| 28  | 100784 | <i>Balearica regulorum gibbericeps</i>     | East African grey crowned-crane | T3, T6a, T6                 | RLQKR                            | BK010019                 |
| 29  | 43346  | <i>Bison bison bison</i>                   | American bison                  | Long propeptide             | RLRRR                            | BK010020                 |
| 30  | 39328  | <i>Boaedon fuliginosus</i>                 | (African) brown house snake     | T3, T6a                     | RIRR                             | BK010021                 |
| 31  | 150288 | <i>Boleophthalmus pectinirostris</i>       | great blue-spotted mudskipper   | Long propeptide, T6a        | RQYRS                            | BK010022                 |
| 32  | 9915   | <i>Bos indicus</i>                         | Zebu                            | Long propeptide             | RLRRR                            | BK010023                 |
| 33  | 9913   | <i>Bos taurus</i>                          | Cattle                          | Long propeptide             | RLRRR                            | BK010024                 |
| 34  | 89462  | <i>Bubalus bubalis</i>                     | Water buffalo                   | Long propeptide             | RLRRQ                            | BK010025                 |
| 35  | 30397  | <i>Buteo buteo</i>                         | Common buzzard                  | T3, T6a, T6                 | RLQKR                            | BK010026                 |
| 36  | 198806 | <i>Calidris pugnax</i>                     | Ruff                            | T3, T6a, T6                 | RLRKR                            | XM_014943048.1           |
| 37  | 9483   | <i>Callithrix jacchus</i>                  | White-tufted-ear marmoset       | Long propeptide             | RQRR                             | BK010027                 |
| 38  | 7868   | <i>Callorhynchus milii</i>                 | Elephant shark                  | Long propeptide, T6a        | HVRAR                            | XM_007902869.1           |
| 39  | 9244   | <i>Calypte anna</i>                        | Anna's hummingbird              | T3, T6a, T6                 | RLQKR                            | BK010028                 |
| 40  | 9837   | <i>Camelus bactrianus</i>                  | Bactrian camel                  | T6                          | RLWRR                            | BK010029                 |
| 41  | 9838   | <i>Camelus dromedarius</i>                 | Arabian camel                   | T6                          | RLWRR                            | BK010030                 |
| 42  | 51853  | <i>Candoia aspera</i>                      | Viper boa                       | T3, T6a                     | RLRR                             | BK010031                 |
| 43  | 9615   | <i>Canis lupus familiaris</i>              | Domestic dog                    | T3, T6a                     | RLRR                             | NM_001242712.1           |
| 44  | 9925   | <i>Capra hircus</i>                        | Goat                            | Long propeptide             | RLRR                             | XM_018056149.1           |
| 45  | 279965 | <i>Caprimulgus carolinensis</i>            | Chuck-will's-widow              | T3, T6a, T6                 | RLQKR                            | BK010032                 |
| 46  | 54380  | <i>Cariama cristata</i>                    | Red-legged seriema              | T3, T6a, T6                 | RLQKR                            | BK010033                 |
| 47  | 9478   | <i>Carlito syrichta</i>                    | Philippine tarsier              | Long propeptide, T6a, T6    | RQRR                             | BK010034                 |
| 48  | 43455  | <i>Cathartes aura</i>                      | turkey vulture                  | T3, T6a                     | RLQKR                            | BK010035                 |
| 49  | 10141  | <i>Cavia porcellus</i>                     | Guinea pig                      | T3, T6a, T6                 | RRRRR                            | XM_013155744.1           |
| 50  | 73337  | <i>Ceratotherium simum simum</i>           | Southern white rhinoceros       | Long propeptide             | RRLQR                            | BK010036                 |

Supplemental Table 1. ADAMTS13 domain structure for selected vertebrate species  
Page 3 of 11

| No. | Tax ID | Organism name                 | Common name                    | Domains absent <sup>a</sup>             | Furin site sequence <sup>b</sup> | GenBank accession number  |
|-----|--------|-------------------------------|--------------------------------|-----------------------------------------|----------------------------------|---------------------------|
| 51  | 9531   | <i>Cercocebus atys</i>        | Sooty mangabey                 | Long propeptide, T6a                    | RQRR                             | BK010037                  |
| 52  | 8897   | <i>Chaetura pelagica</i>      | Chimney swift                  | T3, T6a, T6                             | RLQKR                            | BK010038                  |
| 53  | 50402  | <i>Charadrius vociferus</i>   | Killdeer                       | T3, T6a, T6                             | RLQKR                            | BK010039                  |
| 54  | 8469   | <i>Chelonia mydas</i>         | Green sea turtle               | None                                    | RLWKR                            | BK010040                  |
| 55  | 8475   | <i>Chelydra serpentina</i>    | snapping turtle                | None                                    | RLWKR                            | BK010041                  |
| 56  | 586796 | <i>Chiloscyllium griseum</i>  | Grey bambooshark               | None                                    | RRSVR                            | BK010042                  |
| 57  | 34839  | <i>Chinchilla lanigera</i>    | Long-tailed chinchilla         | T3, T6                                  | RQRRRRRWGR                       | XM_013506558.1            |
| 58  | 187382 | <i>Chlamydotis macqueenii</i> | Macqueen's bustard             | T3, T6a, T6                             | RLQKR                            | BK010043                  |
| 59  | 60711  | <i>Chlorocebus sabaeus</i>    | Green monkey                   | Long propeptide, T6a                    | RQRR                             | XM_008005775.1            |
| 60  | 9358   | <i>Choloepus hoffmanni</i>    | Hoffmann's two-fingered sloth  | None                                    | RLPR                             | Incomplete exon 7, exon 8 |
| 61  | 8479   | <i>Chrysemys picta</i>        | Western painted turtle         | None                                    | RLWKR                            | BK010044                  |
| 62  | 185453 | <i>Chrysochloris asiatica</i> | Cape golden mole               | Long propeptide, T3, T4, T6             | RLPRRAR                          | BK010045                  |
| 63  | 7950   | <i>Clupea harengus</i>        | Atlantic herring               | T6a                                     | RRQRR                            | BK010046                  |
| 64  | 30724  | <i>Clupea pallasii</i>        | Pacific herring                | T6a                                     | RRQRR                            | BK010047                  |
| 65  | 9014   | <i>Colinus virginianus</i>    | northern bobwhite              | T3, T6a                                 | RLQKR                            | BK010048                  |
| 66  | 57412  | <i>Colius striatus</i>        | Speckled mousebird             | T3, T6a, T6                             | RLQKR                            | BK010049                  |
| 67  | 336983 | <i>Colobus angolensis</i>     | Angolan colobus                | Long propeptide, T6a                    | RQRR                             | BK010050                  |
| 68  | 8932   | <i>Columba livia</i>          | Rock pigeon                    | T2 (4 Cys), T3, T4, T5 (2 Cys), T6a, T6 | RLQKR                            | BK010051                  |
| 69  | 85066  | <i>Corvus brachyrhynchos</i>  | American crow                  | T3, T6a, T6                             | RLQKR                            | BK010052                  |
| 70  | 446433 | <i>Cottus rhenanus</i>        | Rheingroppe                    | Long propeptide, T6a                    | RLRR                             | BK010053                  |
| 71  | 9091   | <i>Coturnix coturnix</i>      | Common quail                   | T3, T6a                                 | RLQKR                            | BK010054                  |
| 72  | 10029  | <i>Cricetulus griseus</i>     | Chinese hamster                | Long propeptide                         | RLRWRR                           | BK010055                  |
| 73  | 8501   | <i>Crocodylus niloticus</i>   | Nile crocodile                 | None                                    | KEKKFHPRHWKR                     | BK010056                  |
| 74  | 8502   | <i>Crocodylus porosus</i>     | Australian saltwater crocodile | None                                    | RHWKR                            | XM_019540879.1            |

Supplemental Table 1. ADAMTS13 domain structure for selected vertebrate species

Page 4 of 11

| No. | Tax ID | Organism name                           | Common name                 | Domains absent <sup>a</sup>                     | Furin site sequence <sup>b</sup> | GenBank accession number |
|-----|--------|-----------------------------------------|-----------------------------|-------------------------------------------------|----------------------------------|--------------------------|
| 75  | 384069 | <i>Crotalus mitchellii pyrrhus</i>      | speckled rattlesnake        | T3, T6a                                         | RIRR                             | BK010057                 |
| 76  | 55661  | <i>Cuculus canorus</i>                  | Common cuckoo               | T3, T6a, T6                                     | RLQKR                            | BK010058                 |
| 77  | 156563 | <i>Cyanistes caeruleus</i>              | Blue tit                    | T3, T6a, T6                                     | RLHKR                            | BK010059                 |
| 78  | 193059 | <i>Cyanopica cyanus</i>                 | azure-winged magpie         | T3, T6a, T6                                     | RLQKR                            | BK010060                 |
| 79  | 69242  | <i>Cyprinodon nevadensis pectoralis</i> | Amargosa pupfish            | Long propeptide, T6a                            | RLRR                             | BK010061                 |
| 80  | 28743  | <i>Cyprinodon variegatus</i>            | sheepshead minnow           | Long propeptide, T6a                            | RLRR                             | BK010062                 |
| 81  | 7962   | <i>Cyprinus carpio</i>                  | common carp                 | T6a                                             | RLRR                             | BK010063                 |
| 82  | 7955   | <i>Danio rerio</i>                      | Zebrafish                   | T3, T6a                                         | RLRR                             | XM_002663221.5           |
| 83  | 9361   | <i>Dasyus novemcinctus</i>              | Nine-banded armadillo       | Long propeptide, T3, T6, ½ CUB1, CUB2           | RPLSR                            | BK010064                 |
| 84  | 31869  | <i>Daubentonia madagascariensis</i>     | Aye aye                     | Long propeptide, T6a                            | RRQRR                            | BK010065                 |
| 85  | 13489  | <i>Dicentrarchus labrax</i>             | European sea bass           | Long propeptide, T6a                            | RLRR                             | BK010066                 |
| 86  | 10020  | <i>Dipodomys ordii</i>                  | Ord's kangaroo rat          | Long propeptide, T4 (part), T6a, T6, CUB1, CUB2 | QRRR                             | BK010067                 |
| 87  | 9371   | <i>Echinops telfairi</i>                | Madagascar hedgehog         | Long propeptide, T3, T6a, T6                    | LLGQTR                           | BK010068                 |
| 88  | 187118 | <i>Ectopistes migratorius</i>           | Passenger pigeon            | T2 (4 Cys), T3, T4, T5 (2 Cys), T6a, T6         | RLQKR                            | BK010069                 |
| 89  | 188379 | <i>Egretta garzetta</i>                 | Little egret                | T3, T6a, T6                                     | RLQKR                            | BK010070                 |
| 90  | 28737  | <i>Elephantulus edwardii</i>            | Cape elephant shrew         | Long propeptide, T3, T6                         | FPRNR                            | BK010071                 |
| 91  | 9783   | <i>Elephas maximus</i>                  | Asiatic elephant            | Long propeptide, T3, T6                         | LQRQTR                           | BK010072                 |
| 92  | 71008  | <i>Elgaria multicarinata</i>            | California alligator lizard | T3                                              | RIRR                             | BK010073                 |
| 93  | 29078  | <i>Eptesicus fuscus</i>                 | Big brown bat               | Long propeptide                                 | LRSR                             | BK010074                 |
| 94  | 9793   | <i>Equus asinus</i>                     | Ass                         | None                                            | RLQRR                            | BK010075                 |
| 95  | 9796   | <i>Equus caballus</i>                   | Horse                       | None                                            | RLQRR                            | BK010076                 |
| 96  | 9365   | <i>Erinaceus europaeus</i>              | Western European hedgehog   | Long propeptide, T3, T6a                        | TPSSGLQSPA                       | BK010077                 |
| 97  | 8010   | <i>Esox lucius</i>                      | Northern pike               | T6a                                             | HMKRLPRSR                        | XM_010895705.2           |
| 98  | 481883 | <i>Eublepharis macularius</i>           | leopard gecko               | T3, T6a                                         | RVKR                             | BK010078                 |

Supplemental Table 1. ADAMTS13 domain structure for selected vertebrate species

Page 5 of 11

| No. | Tax ID | Organism name                     | Common name                    | Domains absent <sup>a</sup> | Furin site sequence <sup>b</sup> | GenBank accession number |
|-----|--------|-----------------------------------|--------------------------------|-----------------------------|----------------------------------|--------------------------|
| 99  | 87288  | <i>Eulemur flavifrons</i>         | Sclater's lemur                | Long propeptide, T6a        | RRQRR                            | BK010079                 |
| 100 | 54383  | <i>Eurypyga helias</i>            | Sunbittern                     | T3, T6a, T6                 | RLQKR                            | BK010080                 |
| 101 | 345164 | <i>Falco cherrug</i>              | Saker falcon                   | T3, T6a, T6                 | RLQKR                            | BK010081                 |
| 102 | 9685   | <i>Felis catus</i>                | Domestic cat                   | T3                          | RLRR                             | BK010082                 |
| 103 | 59894  | <i>Ficedula albicollis</i>        | Collared flycatcher            | T3, T6a, T6                 | RLHKR                            | XM_005055623.2           |
| 104 | 885580 | <i>Fukomys damarensis</i>         | Damara mole-rat                | Long propeptide, T3, T6     | RRTRRR                           | XM_010608913.1           |
| 105 | 30455  | <i>Fulmarus glacialis</i>         | Northern fulmar                | T3, T6a, T6                 | RLQKR                            | BK010083                 |
| 106 | 8078   | <i>Fundulus heteroclitus</i>      | Mummichog, Atlantic killifish  | Long propeptide, T6a        | RLRR                             | XM_012866268.1           |
| 107 | 8049   | <i>Gadus morhua</i>               | Atlantic cod                   | Long propeptide, T6a        | PGQRRWPR                         | BK010084                 |
| 108 | 482537 | <i>Galeopterus variegatus</i>     | Sunda flying lemur             | None                        | RLRLRR                           | BK010085                 |
| 109 | 9031   | <i>Gallus gallus</i>              | Chicken                        | T3, T6a                     | RLRR                             | XM_004945941.2           |
| 110 | 69293  | <i>Gasterosteus aculeatus</i>     | Three-spined stickleback       | Long propeptide, T6a        | RLQKR                            | BK010086                 |
| 111 | 37040  | <i>Gavia stellata</i>             | Red-throated loon              | T3, T6a, T6                 | RLQKR                            | BK010087                 |
| 112 | 94835  | <i>Gavialis gangeticus</i>        | gharial                        | None                        | RLWKR                            | BK010088                 |
| 113 | 48883  | <i>Geospiza fortis</i>            | Medium ground finch            | T3, T6a, T6                 | RLHKR                            | BK010089                 |
| 114 | 9593   | <i>Gorilla gorilla</i>            | Gorilla                        | Long propeptide, T6a        | RQRR                             | BK010090                 |
| 115 | 8969   | <i>Haliaeetus albicilla</i>       | White-tailed eagle             | T3, T6a, T6                 | RLQKR                            | BK010091                 |
| 116 | 8153   | <i>Haplochromis burtoni</i>       | Burton's mouthbreeder          | Long propeptide, T6a        | RLRR                             | XM_005926926.2           |
| 117 | 10181  | <i>Heterocephalus glaber</i>      | Naked mole-rat                 | T3, T6                      | RRTRRR                           | XM_013073846.1           |
| 118 | 9606   | <i>Homo sapiens</i>               | Human                          | Long propeptide, T6a        | RQRR                             | AY055376                 |
| 119 | 7998   | <i>Ictalurus punctatus</i>        | Channel catfish                | T6a                         | RRLQR                            | XM_017467535.1           |
| 120 | 43179  | <i>Ictidomys tridecemlineatus</i> | Thirteen-lined ground squirrel | Long propeptide, T6         | RLQRRRR                          | XM_005337003.1           |
| 121 | 51337  | <i>Jaculus jaculus</i>            | Lesser Egyptian jerboa         | Long propeptide             | RLRKTR                           | BK010092                 |
| 122 | 215358 | <i>Larimichthys crocea</i>        | Large yellow croaker           | Long propeptide, T6a        | RLRR                             | XM_019274637.1           |
| 123 | 8187   | <i>Lates calcarifer</i>           | barramundi perch               | Long propeptide, T6a        | RRLRR                            | XM_018669486.1           |
| 124 | 7897   | <i>Latimeria chalumnae</i>        | Coelacanth                     | Long propeptide             | KDRKPALQVHRR                     | XM_005990607.1           |

Supplemental Table 1. ADAMTS13 domain structure for selected vertebrate species

Page 6 of 11

| No. | Tax ID  | Organism name                  | Common name                     | Domains absent <sup>a</sup>      | Furin site sequence <sup>b</sup> | GenBank accession number |
|-----|---------|--------------------------------|---------------------------------|----------------------------------|----------------------------------|--------------------------|
| 125 | 7918    | <i>Lepisosteus oculatus</i>    | Spotted gar                     | Long propeptide, T3, T6a         | RRLRR                            | BK010093                 |
| 126 | 9713    | <i>Leptonychotes weddellii</i> | Weddell seal                    | T3, T6                           | RVRR                             | BK010094                 |
| 127 | 188344  | <i>Leptosomus discolor</i>     | Cuckoo roller                   | T3, T6a                          | RLRKR                            | BK010095                 |
| 128 | 7782    | <i>Leucoraja erinacea</i>      | little skate                    | Long propeptide                  | HIRRR                            | BK010096                 |
| 129 | 9785    | <i>Loxodonta africana</i>      | African elephant                | Long propeptide, T3, T6          | QRQTR                            | BK010097                 |
| 130 | 162951  | <i>Lyrurus tetrix tetrix</i>   | black grouse                    | T3, T6a                          | RLQKR                            | BK010098                 |
| 131 | 9541    | <i>Macaca fascicularis</i>     | Crab-eating macaque, cynomolgus | Long propeptide, T6a             | RQRR                             | BK010099                 |
| 132 | 9544    | <i>Macaca mulatta</i>          | Rhesus macaque                  | Long propeptide, T6a             | RQRR                             | BK010100                 |
| 133 | 1356389 | <i>Machlolophus spilonotus</i> | yellow-cheeked tit              | T3, T6a, T6                      | RLHKR                            | BK010101                 |
| 134 | 9315    | <i>Macropus eugenii</i>        | Tammar Wallaby                  | None                             | RISKR                            | BK010102                 |
| 135 | 328815  | <i>Manacus vitellinus</i>      | Golden-collared manakin         | T3, T6a, T6                      | RLQKR                            | XM_018074289.1           |
| 136 | 9568    | <i>Mandrillus leucophaeus</i>  | Drill                           | Long propeptide, T6a             | RQRR                             | BK010103                 |
| 137 | 143292  | <i>Manis pentadactyla</i>      | Chinese pangolin                | Long propeptide                  | RLRR                             | BK010104                 |
| 138 | 9995    | <i>Marmota monax</i>           | woodchuck                       | Long propeptide (Exons 2-2a), T6 | RLQRRRR                          | BK010105                 |
| 139 | 9103    | <i>Meleagris gallopavo</i>     | Turkey                          | T3, T6a                          | RLQKR                            | XM_010720964.2           |
| 140 | 13146   | <i>Melopsittacus undulatus</i> | Budgerigar                      | T3, T6a, T6                      | RLQKR                            | BK010106                 |
| 141 | 10047   | <i>Meriones unguiculatus</i>   | Mongolian gerbil                | Long propeptide                  | RLRWRR                           | BK010107                 |
| 142 | 57421   | <i>Merops nubicus</i>          | Carmine bee-eater               | T3, T6a, T6                      | RLQKR                            | BK010108                 |
| 143 | 54374   | <i>Mesitornis unicolor</i>     | Brown roatelo                   | T3, T6a, T6                      | RLQKR                            | BK010109                 |
| 144 | 10036   | <i>Mesocricetus auratus</i>    | Golden hamster                  | Long propeptide, T6a             | RLRWRR                           | XM_013124700.1           |
| 145 | 30608   | <i>Microcebus murinus</i>      | Grey mouse lemur                | Long propeptide, T6a             | RRQRR                            | XM_012781995.1           |
| 146 | 79684   | <i>Microtus ochrogaster</i>    | Prairie vole                    | Long propeptide, T6a             | RLRWRR                           | BK010110                 |
| 147 | 47230   | <i>Microtus arvalis</i>        | Common vole                     | Long propeptide, T6a             | RLRWRR                           | BK010111                 |
| 148 | 13616   | <i>Monodelphis domestica</i>   | Gray short-tailed opossum       | None                             | RISKR                            | XM_001371685.4           |



Supplemental Table 1. ADAMTS13 domain structure for selected vertebrate species  
Page 7 of 11

| No. | Tax ID  | Organism name                      | Common name                            | Domains absent <sup>a</sup>        | Furin site sequence <sup>b</sup> | GenBank accession number |
|-----|---------|------------------------------------|----------------------------------------|------------------------------------|----------------------------------|--------------------------|
| 149 | 10090   | <i>Mus musculus</i>                | House mouse                            | Long propeptide, T6                | RLRRRR                           | AB112362.1               |
| 150 | 9669    | <i>Mustela putorius furo</i>       | Domestic ferret                        | None                               | RVRRR                            | XM_013058572.1           |
| 151 | 447135  | <i>Myodes glareolus</i>            | Bank vole                              | Long propeptide, T6a               | RLRWRR                           | BK010112                 |
| 152 | 109478  | <i>Myotis brandtii</i>             | Brandt's bat                           | Long propeptide, T6a               | RLRR                             | BK010113                 |
| 153 | 225400  | <i>Myotis davidii</i>              | David's myotis                         | Long propeptide, T6a               | RLRR                             | BK010114                 |
| 154 | 59463   | <i>Myotis lucifugus</i>            | Little brown bat                       | Long propeptide, T6a               | RLRR                             | BK010115                 |
| 155 | 1026970 | <i>Nannospalax galili</i>          | Upper Galilee mountains blind mole rat | Long propeptide, T6a, ½ CUB1, CUB2 | HLKRLRWGR                        | BK010116                 |
| 156 | 125878  | <i>Nanorana parkeri</i>            | high Himalaya frog                     | None                               | HLSKR                            | XM_018563708.1           |
| 157 | 32507   | <i>Neolamprologus brichardi</i>    | lyretail cichlid                       | Long propeptide, T6a               | RLRR                             | BK010117                 |
| 158 | 176057  | <i>Nestor notabilis</i>            | Kea                                    | T3, T6a, T6                        | RLQKR                            | BK010118                 |
| 159 | 128390  | <i>Nipponia nippon</i>             | Crested ibis                           | T3, T6a, T6                        | RLQKR                            | BK010119                 |
| 160 | 61853   | <i>Nomascus leucogenys</i>         | Northern white cheeked gibbon          | Long propeptide, T6a               | RQRRRQRR                         | BK010120                 |
| 161 | 105023  | <i>Nothobranchius furzeri</i>      | turquoise killifish                    | Long propeptide, T6a               | RLRR                             | XM_015972136.1           |
| 162 | 8208    | <i>Notothenia coriiceps</i>        | black rockcod                          | Long propeptide, T6a               | RLPR                             | BK010121                 |
| 163 | 8996    | <i>Numida meleagris</i>            | helmeted guineafowl                    | T3, T6a                            | RLRKR                            | BK010122                 |
| 164 | 9978    | <i>Ochotona princeps</i>           | American pike                          | Long propeptide                    | PPRR                             | BK010123                 |
| 165 | 10160   | <i>Octodon degus</i>               | Degu                                   | T3, T6                             | RGTRRWRR                         | BK010124                 |
| 166 | 9708    | <i>Odobenus rosmarus divergens</i> | Pacific walrus                         | T3, T6                             | RIRR                             | BK010125                 |
| 167 | 8022    | <i>Oncorhynchus mykiss</i>         | Rainbow trout                          | T6a                                | KRLRRRR                          | BK010126                 |
| 168 | 8665    | <i>Ophiophagus hannah</i>          | king cobra                             | T3, T6a                            | RIRR                             | BK010127                 |
| 169 | 30419   | <i>Opisthocomus hoazin</i>         | Hoatzin                                | T3, T6a, T6                        | RLQKR                            | BK010128                 |
| 170 | 9733    | <i>Orcinus orca</i>                | killer whale                           | Long propeptide                    | RPRR                             | BK010129                 |
| 171 | 8128    | <i>Oreochromis niloticus</i>       | Nile tilapia                           | Long propeptide, T6a               | RLRR                             | XM_013271591.2           |
| 172 | 9258    | <i>Ornithorhynchus anatinus</i>    | Platypus                               | T6a                                | RIWKR                            | BK010130                 |
| 173 | 1230840 | <i>Orycteropus afer afer</i>       | Aardvark                               | Long propeptide, T3, T6            | HLRRWIR                          | BK010131                 |



Supplemental Table 1. ADAMTS13 domain structure for selected vertebrate species

Page 8 of 11

| No. | Tax ID  | Organism name                                     | Common name                              | Domains absent <sup>a</sup> | Furin site sequence <sup>b</sup> | GenBank accession number |
|-----|---------|---------------------------------------------------|------------------------------------------|-----------------------------|----------------------------------|--------------------------|
| 174 | 9986    | <i>Oryctolagus cuniculus</i>                      | Rabbit                                   | Long propeptide             | SRRRR                            | BK010132                 |
| 175 | 8090    | <i>Oryzias latipes</i>                            | Japanese medaka, rice fish               | Long propeptide, T6a        | RLHR                             | BK010133                 |
| 176 | 109271  | <i>Osteoglossum bicirrhosum</i>                   | Silver arawana                           | T6a                         | RLKR                             | BK010134                 |
| 177 | 30611   | <i>Otolemur garnettii</i>                         | Small-eared galago                       | Long propeptide, T3, T6a    | RWRR                             | BK010135                 |
| 178 | 9940    | <i>Ovis aries</i>                                 | Sheep                                    | Long propeptide             | RLRR                             | XM_012118015.1           |
| 179 | 9598    | <i>Pan troglodytes</i>                            | Chimpanzee                               | Long propeptide, T6a        | RQRR                             | BK010136                 |
| 180 | 9694    | <i>Panthera tigris</i>                            | Tiger (all subspecies)                   | T3                          | RLRR                             | BK010137                 |
| 181 | 94885   | <i>Pantherophis guttatus</i>                      | Red corn snake                           | T3, T6a                     | RIRR                             | BK010138                 |
| 182 | 9555    | <i>Papio anubis</i>                               | olive baboon                             | Long propeptide, T6a        | RQRR                             | BK010139                 |
| 183 | 1071634 | <i>Paradoxornis webbiana</i><br><i>bulomachus</i> | Crow tit                                 | T3, T6a, T6                 | RLHKR                            | BK010140                 |
| 184 | 9157    | <i>Parus major</i>                                | Great tit                                | T3, T6a, T6                 | RLHKR                            | XM_015644841.2           |
| 185 | 9049    | <i>Pavo cristatus</i>                             | Indian peafowl                           | T3, T6a                     | RLQKR                            | BK010141                 |
| 186 | 36300   | <i>Pelecanus crispus</i>                          | Dalmatian pelican                        | T3, T6a, T6                 | PRQKR                            | BK010142                 |
| 187 | 13735   | <i>Pelodiscus sinensis</i>                        | Chinese soft-shelled turtle              | None                        | RLWKR                            | BK010143                 |
| 188 | 367368  | <i>Pelusios castaneus</i>                         | West African mud turtle, sideneck turtle | None                        | RLRKR                            | BK010144                 |
| 189 | 9052    | <i>Perdix perdix</i>                              | Grey partridge                           | T3, T6a                     | RLQKR                            | BK010145                 |
| 190 | 1365757 | <i>Periophthalmodon schlosseri</i>                | giant mudskipper                         | Long propeptide, T6a        | RQYRSVK                          | BK010146                 |
| 191 | 409849  | <i>Periophthalmus magnuspinnatus</i>              | Common mudskipper                        | Long propeptide, T6a        | RQYRSVK                          | BK010147                 |
| 192 | 10041   | <i>Peromyscus leucopus</i>                        | White footed mouse                       | Long propeptide             | RLRWRR                           | BK010148                 |
| 193 | 230844  | <i>Peromyscus maniculatus bairdii</i>             | Prairie deer mouse                       | Long propeptide             | RLRWRR                           | XM_015986629.1           |
| 194 | 97097   | <i>Phaethon lepturus</i>                          | White-tailed tropicbird                  | T3, T6a                     | RLQKR                            | BK010149                 |
| 195 | 9209    | <i>Phalacrocorax carbo</i>                        | Great cormorant                          | T3, T6a, T6                 | RLQKR                            | BK010150                 |
| 196 | 9054    | <i>Phasianus colchicus</i>                        | Ring-necked pheasant                     | T3, T6a                     | RLQKR                            | BK010151                 |
| 197 | 9218    | <i>Phoenicopterus ruber ruber</i>                 | American flamingo                        | T3, T6a, T6                 | RLQKR                            | BK010152                 |

Supplemental Table 1. ADAMTS13 domain structure for selected vertebrate species  
Page 9 of 11

| No. | Tax ID | Organism name                | Common name                | Domains absent <sup>a</sup>  | Furin site sequence <sup>b</sup> | GenBank accession number |
|-----|--------|------------------------------|----------------------------|------------------------------|----------------------------------|--------------------------|
| 198 | 9755   | Physeter catodon             | Sperm whale                | Long propeptide              | RLRRR                            | BK010153                 |
| 199 | 118200 | Picoides pubescens           | Downy woodpecker           | T3, T6a, T6                  | RRRRR                            | BK010154                 |
| 200 | 90988  | Pimephales promelas          | fathead minnow             | T6a                          | RLRR                             | BK010155                 |
| 201 | 345573 | Podiceps cristatus           | great crested grebe        | T3, T6a, T6                  | RLQKR                            | BK010156                 |
| 202 | 257846 | Podoces hendersoni           | Mongolian ground-jay       | T3, T6a, T6                  | RLQKR                            | BK010157                 |
| 203 | 48698  | Poecilia formosa             | Amazon molly               | Long propeptide, T6a         | RLRR                             | XM_007565190.2           |
| 204 | 48699  | Poecilia latipinna           | sailfin molly              | Long propeptide, T6a         | RLRR                             | XM_015021450.1           |
| 205 | 48701  | Poecilia mexicana            | shortfin molly             | Long propeptide, T6a         | RLRR                             | XM_014986798.1           |
| 206 | 8081   | Poecilia reticulata          | Guppy                      | Long propeptide, T6a         | RLRR                             | XM_008419233.2           |
| 207 | 103695 | Pogona vitticeps,            | central bearded dragon     | Long propeptide              | RVRRK                            | BK010158                 |
| 208 | 9601   | Pongo abelii                 | Orangutan                  | Long propeptide, T6a         | RQRR                             | BK010159                 |
| 209 | 9813   | Procavia capensis            | Cape rock hyrax            | Long propeptide, T3, T6a, T6 | KSRPASPGPQTQ TWV                 | BK010160                 |
| 210 | 379532 | Propithecus coquereli        | Coquerel's sifaka          | Long propeptide, T6a         | KGLRRESR                         | XM_012664714.1           |
| 211 | 103944 | Protobothrops mucrosquamatus | Chinese Habu snake         | T3, T6a                      | RIRR                             | BK010161                 |
| 212 | 245875 | Pseudopleuronectes yokohamae | marbled flounder           | Long propeptide, T6a         | GVRLPRSAA                        | BK010162                 |
| 213 | 181119 | Pseudopodoces humilis        | Tibetan ground-tit         | T3, T6a, T6                  | RLHKR                            | XM_014258024.1           |
| 214 | 240206 | Pterocles gutturalis         | Yellow-throated sandgrouse | T3, T6a, T6                  | RLQKR                            | BK010163                 |
| 215 | 303518 | Pundamilia nyererei          | (a Lake Victoria cichlid)  | Long propeptide, T6a         | RLRR                             | BK010164                 |
| 216 | 42514  | Pygocentrus nattereri        | red-bellied piranha        | T6a                          | RLQR                             | XM_017696426.1           |
| 217 | 9238   | Pygoscelis adeliae           | Adelie penguin             | T3, T6a, T6                  | RLQKR                            | BK010165                 |
| 218 | 176946 | Python bivittatus            | Burmese python             | T3, T6a                      | RIRR                             | BK010166                 |
| 219 | 10116  | Rattus norvegicus            | Norway rat                 | Long propeptide, T6          | RQRR                             | XM_006233879.2           |
| 220 | 163638 | Rhamphochromis esox          | Tigerfish (cichlid)        | Long propeptide, T6a         | RLRR                             | BK010167                 |
| 221 | 259920 | Rhincodon typus              | Whale shark                | None                         | RSRSSLVTRR                       | BK010168                 |
| 222 | 61622  | Rhinopithecus roxellana      | Golden snub-nosed monkey   | Long propeptide, T6a         | RQRR                             | BK010169                 |

Supplemental Table 1. ADAMTS13 domain structure for selected vertebrate species  
Page 10 of 11

| No. | Tax ID  | Organism name                | Common name                      | Domains absent <sup>a</sup>  | Furin site sequence <sup>b</sup> | GenBank accession number |
|-----|---------|------------------------------|----------------------------------|------------------------------|----------------------------------|--------------------------|
| 223 | 9407    | Rousettus aegyptiacus        | Egyptian rousette (bat)          | None                         | RPSRPPRH                         | BK010170                 |
| 224 | 8030    | Salmo salar                  | Atlantic salmon                  | T6a                          | HMKRLRSRR                        | XM_014160257.1           |
| 225 | 9305    | Sarcophilus harrisii         | Tasmanian devil                  | None                         | RISKR                            | XM_012553998.1           |
| 226 | 166764  | Scartelaos histophorus       | walking goby                     | Long propeptide, T6a         | RQHRSVK                          | BK010171                 |
| 227 | 155319  | Scincella lateralis          | ground skink                     | Long propeptide, T3          | RVRK                             | BK010172                 |
| 228 | 113540  | Scleropages formosus         | Asian bonytongue                 | T6a                          | RLKR                             | XM_018758492.1           |
| 229 | 7830    | Scyliorhinus canicula        | Smaller spotted catshark         | T6a                          | RSSLVRR                          | BK010173                 |
| 230 | 72099   | Sebastes rubrivinctus        | flag rockfish                    | Long propeptide, T6a         | RPRR                             | BK010174                 |
| 231 | 9135    | Serinus canaria              | Common canary                    | T3, T6a, T6                  | RLHKR                            | BK010175                 |
| 232 | 1608454 | Sinocyclocheilus anshuiensis | Eyeless golden-line barbel       | T6a                          | RLRR                             | BK010176                 |
| 233 | 42254   | Sorex araneus                | European shrew                   | Long propeptide, T3, T6a     | PPPPSGQSWA                       | XM_004613415.1           |
| 234 | 144197  | Stegastes partitus           | Bicolor damselfish               | Long propeptide, T6a         | RLRR                             | BK010177                 |
| 235 | 142480  | Sternotherus odoratus        | stinkpot turtle                  | None                         | RLWKR                            | BK010178                 |
| 236 | 441894  | Struthio camelus australis   | African ostrich                  | T3, T6a                      | RLQKR                            | BK010179                 |
| 237 | 9172    | Sturnus vulgaris             | Common starling                  | T3, T6a, T6                  | RLHKR                            | XM_014873269.1           |
| 238 | 9378    | Suncus murinus               | House shrew                      | Long propeptide, T3, T4, T6a | SETPWK                           | BK010180                 |
| 239 | 9823    | Sus scrofa                   | Pig                              | Long propeptide              | RPPARRLWRR                       | XM_013987089.1           |
| 240 | 59729   | Taeniopygia guttata          | Zebra finch                      | T3, T6a, T6                  | RLHKR                            | BK010181                 |
| 241 | 31033   | Takifugu rubripes            | Fugu                             | Long propeptide, T6a         | RARR                             | XM_011615207.1           |
| 242 | 121530  | Tauraco erythrolophus        | Red crested turaco               | T3, T6a, T6                  | RLRKR                            | BK010182                 |
| 243 | 158814  | Terrapene carolina           | box turtle                       | None                         | RLWKR                            | BK010183                 |
| 244 | 99883   | Tetraodon nigroviridis       | Spotted green pufferfish         | Long propeptide, T6a         | RGRLPR                           | BK010184                 |
| 245 | 35003   | Thamnophis couchii           | Sierra garter snake              | T3, T6a                      | RIRR                             | BK010185                 |
| 246 | 35005   | Thamnophis elegans           | Western terrestrial garter snake | T3, T6a                      | RIRR                             | BK010186                 |

Supplemental Table 1. ADAMTS13 domain structure for selected vertebrate species

Page 11 of 11

| No. | Tax ID | Organism name                  | Common name            | Domains absent <sup>a</sup> | Furin site sequence <sup>b</sup> | GenBank accession number |
|-----|--------|--------------------------------|------------------------|-----------------------------|----------------------------------|--------------------------|
| 247 | 35019  | Thamnophis sirtalis            | Common garter snake    | T3, T6a                     | RIRR                             | BK010187                 |
| 248 | 8238   | Thunnus orientalis             | Pacific bluefin tuna   | Long propeptide, T6a        | RQRR                             | BK010188                 |
| 249 | 94827  | Tinamus guttatus               | White-throated tinamou | T3, T6a                     | RLHKR                            | BK010189                 |
| 250 | 127582 | Trichechus manatus latirostris | Caribbean manatee      | T3, T6                      | RLRR                             | BK010190                 |
| 251 | 246437 | Tupaia chinensis               | Chinese tree shrew     | T3, T6a, T6                 | RQRR                             | BK010191                 |
| 252 | 9739   | Tursiops truncatus             | Bottle-nosed dolphin   | Long propeptide             | RLRR                             | BK010192                 |
| 253 | 56313  | Tyto alba                      | Barn owl               | T3, T6a                     | RLQKR                            | BK010193                 |
| 254 | 9644   | Ursus arctos                   | brown bear             | T6                          | RVRR                             | BK010194                 |
| 255 | 29073  | Ursus maritimus                | Polar bear             | T6                          | RVRR                             | c                        |
| 256 | 30538  | Vicugna pacos                  | Alpaca                 | T6                          | RLWRR                            | BK010195                 |
| 257 | 31156  | Vipera berus berus             | common viper           | T3, T6a                     | RVRR                             | BK010196                 |
| 258 | 196253 | Xenopeltis unicolor            | sunbeam snake          | T3, T6a                     | RIRR                             | BK010197                 |
| 259 | 8364   | Xenopus (Silurana) tropicalis  | Western clawed frog    | None                        | RISKR                            | BK010198                 |
| 260 | 8355   | Xenopus laevis                 | African clawed frog    | None                        | RIKKR                            | BK010199                 |
| 261 | 32473  | Xiphophorus couchianus         | Monterrey platyfish    | Long propeptide, T6a        | RLRR                             | BK010200                 |
| 262 | 8084   | Xiphophorus hellerii           | green swordtail        | Long propeptide, T6a        | RLRH                             | BK010201                 |
| 263 | 8083   | Xiphophorus maculatus          | Southern platyfish     | Long propeptide, T6a        | RLRR                             | XM_014471723.1           |
| 264 | 44394  | Zonotrichia albicollis         | White throated sparrow | T3, T6a, T6                 | RLHKR                            | XM_014272103.1           |

Species for which plasma samples were assayed are indicated in green shading.

<sup>a</sup>Ancestral ADAMTS13 included these domains: a long propeptide, metalloprotease, disintegrin-like, TSP1 (T), Cys-rich, Spacer, 8 additional T domains (numbered T3, T4, T5, T6a, T6, T7, T8), and two CUB domains.

<sup>b</sup>Amino acid sequences at the potential furin cleavage site in ADAMTS13 are shaded yellow if the sequence does not contain at least one RxxR or RxxKR motif.

<sup>c</sup>*U. maritimus* ADAMTS13 cDNA sequence was not deposited because it is almost identical to *U. arctos*.

**Supplemental Table 2. Inhibition of Plasma ADAMTS13 by Monoclonal Antibody 3H9**

| Species     | Activity (percent of control) with MAb 3H9 |                 |             |
|-------------|--------------------------------------------|-----------------|-------------|
|             | 3.2 $\mu$ g                                | 6.4 $\mu$ g     | 9.6 $\mu$ g |
| Armadillo   | 98                                         |                 |             |
| Baboon      | 0                                          |                 |             |
| Cattle      | 107                                        | 99              | 103         |
| Chicken*    | 125                                        | 119             | 131         |
| Dog*        | 20                                         | 7.4             |             |
| Chimpanzee  | 0 (2.3 $\mu$ g)                            |                 |             |
| Ferret      | 10.2                                       | 6.1 (8 $\mu$ g) |             |
| Frog        | 104                                        |                 |             |
| Goat        | 105                                        | 107             |             |
| Horse*      | 72                                         | 36              |             |
| Human       | 0                                          |                 |             |
| Macaque     | 0                                          |                 |             |
| Marmoset    | 0                                          |                 |             |
| Mouse (FVB) | 94                                         |                 |             |
| Pig*        | 49                                         | 21              |             |
| Pigeon*     | 101                                        | 102             | 96          |
| Polar bear  | 57                                         | 42 (8 $\mu$ g)  |             |
| Rabbit      | 99                                         |                 |             |
| Rat*        | 95                                         | 97              | 100         |
| Sheep*      | 102                                        |                 |             |

Plasma was assayed with human-VWF71 or cattle-VWF71(\*) without or with the indicated amounts of MAb 3H9 in a total assay volume of 200  $\mu$ L. Cleavage rates are expressed as a percentage of the rate observed in the absence of MAb 3H9. Standard errors are <10% of the values shown.

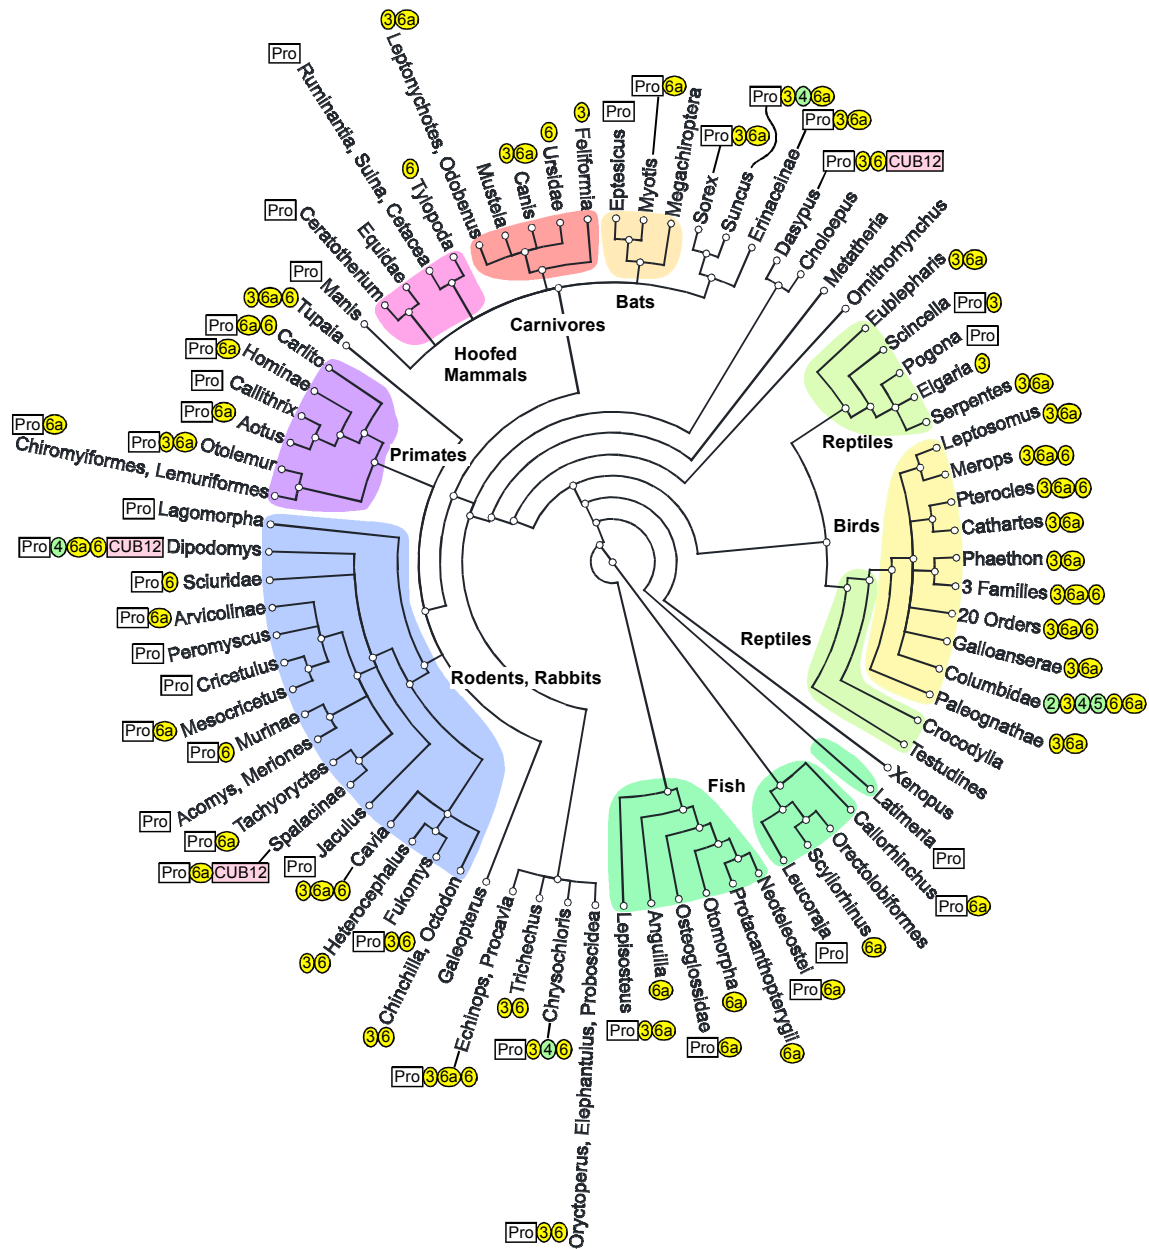

**Figure S1. Phylogram of vertebrate ADAMTS13.** A phylogenetic tree for the species in Table S1 was generated with Common Tree ([www.ncbi.nlm.nih.gov/Taxonomy/CommonTree/](http://www.ncbi.nlm.nih.gov/Taxonomy/CommonTree/)) and Dendroscope (version 3.5.7) (Huson DH, Scornavacca C. Dendroscope 3: an interactive tool for rooted phylogenetic trees and networks. *Syst Biol.* 2012;**61**(6):1061-1067). Labels indicate selected major groups of carnivores, bats, reptiles, birds, fish, rodents, primates, and hoofed mammals. Figures at the periphery indicate domains that are absent from ADAMTS13 in the corresponding species, colored as in Figure 1, including the long propeptide (Pro, white), specific T domains (yellow or green), and CUB domains (pink).

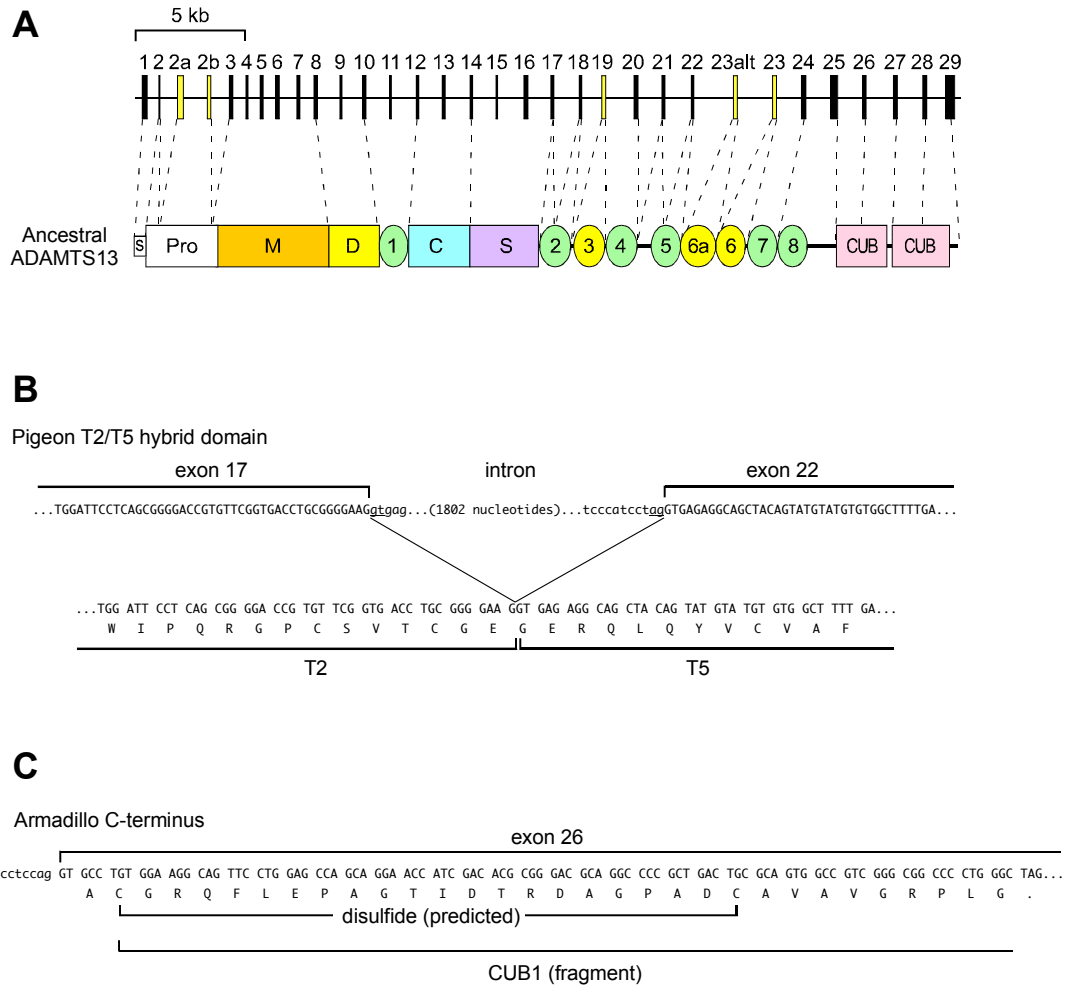

**Figure S2. Vertebrate ADAMTS13 gene structure.** (A) Human ADAMTS13 is encoded by 29 exons, whereas the ancestral ADAMTS13 gene had 32 exons. The 3 additional exons present in ancestral ADAMTS13 but not human ADAMTS13 are exons 2a, 2b, and 23 alternate (23alt). The correlation between exons and protein domains is indicated. Domain abbreviations and colors are the same as in **Figure 1**. The 5 exons that have been deleted frequently in extant vertebrates, and the domains they encode, are colored *yellow*. (B) The pigeon ADAMTS13 gene lacks exons 18-22. Splicing joins exon 17 and exon 22, which together encode a complete hybrid T domain composed of parts of T2 and T5. (C) Exon 26 of armadillo ADAMTS13 has a nonsense codon after Gly<sup>1134</sup>, truncating the first CUB domain after 31 residues.
